# Supplementary material for: Scintillation-based potassium signalling using 2,5-diphenyloxazole-tagged aza-18-crown-6Electronic supplementary information (ESI) available: titration of scintillant-tagged 4 against TFA. See http://www.rsc.org/suppdata/cc/b2/b209337e/
Source: Royal Society of Chemistry journal article supplement (doi:10.1039/b209337e), 2002-11-28
Supplement: b209337e.doc [file b209337e.doc]

**Electronic Supplementary Information**

Data and graph for the titration of a 10mM toluene solution of scintillant-tagged aza-18-crown-6 **4** against concentration of added trifluoroacetic acid, in the presence of [14C]hexadecane. The titration was performed in duplicate and the maximum cpm possible per assay = 1904199 cpm.

| [TFA] / mM | cpm | | average cpm |
| --- | --- | --- | --- |
| 0 | 485222 | 483500 | 484361 |
| 2 | 1260510 | 1271638 | 1266074 |
| 4 | 1559142 | 1578621 | 1568882 |
| 6 | 1717329 | 1733483 | 1725406 |
| 8 | 1823008 | 1792579 | 1807794 |
| 10 | 1869593 | 1813249 | 1841421 |
